# Supplementary material for: Decoration of Ru nanoparticles on γ-alumina with sub-nanometer ceria species for efficient catalytic ammonia synthesis
Source: Royal Society of Chemistry journal article supplement (doi:10.1039/d3cy00489a), 2023-01-01
Supplement: d3cy00489a1.pdf [file d3cy00489a1.pdf]

Electronic Supplementary Material (ESI) for Catalysis Science & Technology.  
This journal is © The Royal Society of Chemistry 2021

## Support information

### **Decoration of Ru nanoparticles on $\gamma$ -alumina with sub-nanometer ceria species for efficient catalytic ammonia synthesis**

Ji Feng,<sup>a,b</sup> Lin Liu,<sup>a,b\*</sup> Xiaohua Ju,<sup>a</sup> Qike Jiang,<sup>a</sup> Jiemin Wang,<sup>a,c</sup> Jianping Guo,<sup>a,b</sup> Teng He,<sup>a,b</sup> Ping Chen<sup>a,b</sup>

<sup>a</sup> *Dalian National Laboratory for Clean Energy, State Key Laboratory of Catalysis, Dalian Institute of Chemical Physics, Chinese Academy of Sciences, Dalian 116023, China*

<sup>b</sup> *Center of Materials Science and Optoelectronics Engineering, University of Chinese Academy of Sciences, Beijing 100049, China*

<sup>c</sup> *Zhang Dayu School of Chemistry, Dalian University of Technology, Dalian 116024, China*

*E-mail: liulin@dicp.ac.cn*

## 1. Supporting results

Table S1. The comparison of catalytic performances of typical Ru-based catalysts for ammonia synthesis.

| Catalysts                                                | Loading (wt%) | T (°C) | Pressure (MPa) | GHSV (mL g <sub>cat</sub> <sup>-1</sup> h <sup>-1</sup> ) | NH <sub>3</sub> synthesis rate (μmol g <sub>cat</sub> <sup>-1</sup> h <sup>-1</sup> ) | Specific NH <sub>3</sub> synthesis rate (mmol g <sub>Ru</sub> <sup>-1</sup> h <sup>-1</sup> ) | Ref.      |
|----------------------------------------------------------|---------------|--------|----------------|-----------------------------------------------------------|---------------------------------------------------------------------------------------|-----------------------------------------------------------------------------------------------|-----------|
| Ru/rod-CeO <sub>2</sub>                                  | 4             | 400    | 1.0            | 18000                                                     | 3830                                                                                  | 95.8                                                                                          | 1         |
| Ru/cubic-CeO <sub>2</sub>                                | 4             | 400    | 1.0            | 18000                                                     | 1289                                                                                  | 32.2                                                                                          | 1         |
| Ru/spherical-CeO <sub>2</sub>                            | 4             | 400    | 1.0            | 18000                                                     | 529                                                                                   | 13.2                                                                                          | 1         |
| Cs-Ru/rod-CeO <sub>2</sub>                               | 4             | 400    | 1.0            | 18000                                                     | 14266                                                                                 | 356.7                                                                                         | 1         |
| Ru/La <sub>0.5</sub> Ce <sub>0.5</sub> O <sub>1.75</sub> | 5             | 350    | 1.0            | 72000                                                     | 31300                                                                                 | 626.0                                                                                         | 2         |
| Ru/La <sub>2</sub> O <sub>3</sub>                        | 5             | 350    | 1.0            | 72000                                                     | 10800                                                                                 | 216.0                                                                                         | 2         |
| Ru/Ce <sub>0.6</sub> Zr <sub>0.4</sub> O <sub>2</sub>    | 4.0           | 390    | 1.0            | 18000                                                     | 1700                                                                                  | 42.5                                                                                          | 3         |
| Ru/Ti <sub>x</sub> Ce <sub>1-x</sub> O <sub>2</sub>      | 3.0           | 400    | 1.0            | 36000                                                     | 14580                                                                                 | 486.0                                                                                         | 4         |
| Ru/BaCeO <sub>3</sub>                                    | 1.3           | 450    | 3.0            | 36000                                                     | 24000                                                                                 | 1846.2                                                                                        | 5         |
| Ru/CaO                                                   | 1.5           | 400    | 0.1            | 18000                                                     | 160                                                                                   | 10.7                                                                                          | 6         |
| Cs-Ru/MgO                                                | 6.0           | 400    | 0.1            | 18000                                                     | 3350                                                                                  | 55.8                                                                                          | 6         |
| Ba-Ru/AC                                                 | 9.1           | 400    | 0.1            | 18000                                                     | 2230                                                                                  | 24.5                                                                                          | 6         |
| Ru/C12A7:e <sup>-</sup>                                  | 1.2           | 400    | 0.1            | 18000                                                     | 2760                                                                                  | 230.0                                                                                         | 6         |
| Sm-Ru/Al <sub>2</sub> O <sub>3</sub>                     | 12.0          | 400    | 10.0           | 240000                                                    | 145000                                                                                | 1208.3                                                                                        | 7         |
| Ru/Al <sub>2</sub> O <sub>3</sub>                        | 10.0          | 315    | 0.08           |                                                           | 25.0                                                                                  | 0.3                                                                                           | 8         |
| Cs-Ru/Al <sub>2</sub> O <sub>3</sub>                     | 10.0          | 315    | 0.08           |                                                           | 141.5                                                                                 | 1.4                                                                                           | 8         |
| Sm-Ru/Al <sub>2</sub> O <sub>3</sub>                     | 10.0          | 315    | 0.08           |                                                           | 114.6                                                                                 | 1.1                                                                                           | 8         |
| Ru/γ-Al <sub>2</sub> O <sub>3</sub>                      | 6.3           | 400    | 0.1            | 9000                                                      | 789.2                                                                                 | 12.5                                                                                          | 9         |
| K-Ru/Al <sub>2</sub> O <sub>3</sub>                      | 8.0           | 350    | 0.1            | 9000                                                      | 2470                                                                                  | 30.9                                                                                          | 10        |
| Ce-Ru(1:1)/Al <sub>2</sub> O <sub>3</sub>                | 3.0           | 400    | 1.0            | 24000                                                     | 14352                                                                                 | 478.4                                                                                         | This work |
| Ru/Al <sub>2</sub> O <sub>3</sub>                        | 3.0           | 400    | 1.0            | 24000                                                     | 1432                                                                                  | 47.7                                                                                          | This work |

Table S2 Physical and chemical properties of  $\gamma$ -Al<sub>2</sub>O<sub>3</sub>, Ru/Al<sub>2</sub>O<sub>3</sub> and Ce–Ru(x:1)/Al<sub>2</sub>O<sub>3</sub> samples.

| Samples                                       | Ru loading (wt%) | Ce loading (wt%) | Surface area (m <sup>2</sup> g <sup>-1</sup> ) | Ru particle size by TEM (nm) | Metal dispersion by CO chemisorption (%) | Ru particle size by CO chemisorption (nm) |
|-----------------------------------------------|------------------|------------------|------------------------------------------------|------------------------------|------------------------------------------|-------------------------------------------|
| Al <sub>2</sub> O <sub>3</sub>                | –                | –                | 159                                            | –                            | –                                        | –                                         |
| Ru/Al <sub>2</sub> O <sub>3</sub>             | 3.0              | –                | 169                                            | 1.3 ± 0.5                    | 51.1                                     | 2.6                                       |
| Ce–Ru(0.125:1)/Al <sub>2</sub> O <sub>3</sub> | 3.0              | 0.45             | 161                                            | 1.9 ± 0.5                    | 51.5                                     | 2.6                                       |
| Ce–Ru(0.25:1)/Al <sub>2</sub> O <sub>3</sub>  | 3.0              | 0.92             | 168                                            | 1.8 ± 0.5                    | 47.2                                     | 2.9                                       |
| Ce–Ru(0.5:1)/Al <sub>2</sub> O <sub>3</sub>   | 3.0              | 2.0              | 168                                            | 1.8 ± 0.5                    | 61.2                                     | 2.2                                       |
| Ce–Ru(1:1)/Al <sub>2</sub> O <sub>3</sub>     | 3.0              | 4.1              | 169                                            | 1.9 ± 0.5                    | 46.2                                     | 2.9                                       |

Table S3. Kinetic parameters for ammonia synthesis over various Ru-based catalysts.

| Catalysts                                                | $\alpha(\text{NH}_3)$ | $\beta(\text{N}_2)$ | $\gamma(\text{H}_2)$ | Ea (kJ mol <sup>-1</sup> ) | Ref.      |
|----------------------------------------------------------|-----------------------|---------------------|----------------------|----------------------------|-----------|
| Ce–Ru(1:1)/Al <sub>2</sub> O <sub>3</sub>                | –0.2                  | 1.0                 | 0.8                  | 75                         | This work |
| Ru/Al <sub>2</sub> O <sub>3</sub>                        | –1.1                  | 1.0                 | –0.1                 | 82                         | This work |
| Ru/MgO                                                   | –0.3                  | 0.8                 | –0.3                 | 69                         | 11        |
| Cs–Ru/MgO                                                | 0                     | 0.8                 | –0.9                 | 109                        | 11        |
| Ba–Ru/MgO                                                | –0.6                  | 0.8                 | –0.6                 | 77                         | 12        |
| La–Ru/MgO                                                | –0.17                 | 0.85                | –0.15                | 86                         | 13        |
| Ru/Al <sub>2</sub> O <sub>3</sub>                        | –0.4                  | 0.9                 | –0.1                 | 70                         | 11        |
| Ru/K–Al <sub>2</sub> O <sub>3</sub>                      | 0                     | 1.0                 | –0.5                 | 125                        | 11        |
| Ru/MgAl <sub>2</sub> O <sub>4</sub>                      | –0.4                  | 1.0                 | –0.5                 | –                          | 14        |
| Ru/C12A7:e <sup>–</sup>                                  | –1.0                  | 0.46                | 0.97                 | 49                         | 15        |
| Ru/La <sub>0.5</sub> Ce <sub>0.5</sub> O <sub>1.75</sub> | –0.36                 | 0.76                | 0.15                 | 64                         | 2         |
| Ru powder                                                | –0.15                 | 0.96                | –0.72                | 117                        | 16        |
| Ru/BaTiO <sub>2.5</sub> H <sub>0.5</sub>                 | –0.64                 | 0.7                 | 0.2                  | 83                         | 17        |
| Ru/CaH <sub>2</sub>                                      | –1.11                 | 0.55                | 0.87                 | 51                         | 3         |
| Ru/Ca <sub>2</sub> N:e <sup>–</sup>                      | –1.03                 | 0.53                | 0.79                 | 60                         | 3         |

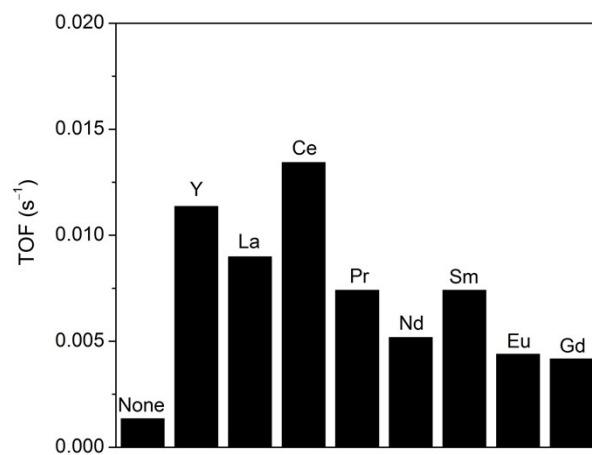

**Fig. S1** TOF<sub>NH<sub>3</sub></sub> values of different RE–Ru(1:1)/Al<sub>2</sub>O<sub>3</sub> catalysts under 1.0 MPa and 400 °C.

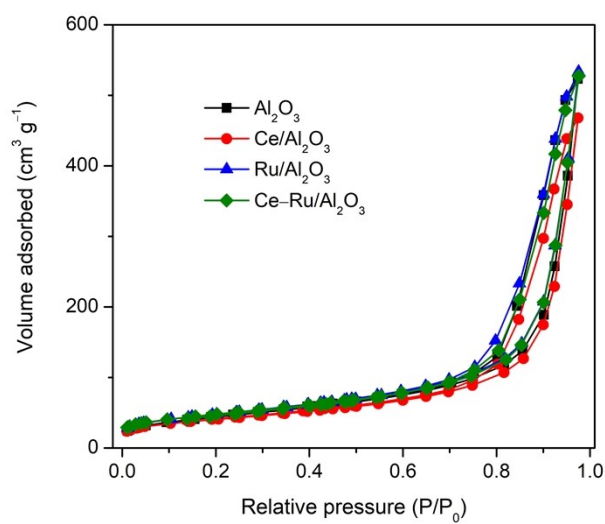

**Fig. S2** N<sub>2</sub> sorption isotherms of the Al<sub>2</sub>O<sub>3</sub>, Ru/Al<sub>2</sub>O<sub>3</sub> and Ce–Ru(x:1)/Al<sub>2</sub>O<sub>3</sub> samples.

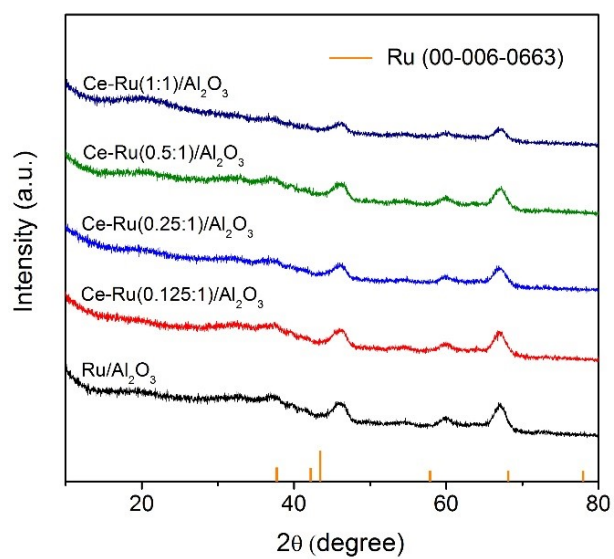

**Fig. S3** XRD patterns of Ru/Al<sub>2</sub>O<sub>3</sub> and Ce–Ru(x:1)/Al<sub>2</sub>O<sub>3</sub> samples with different Ce/Ru ratios.

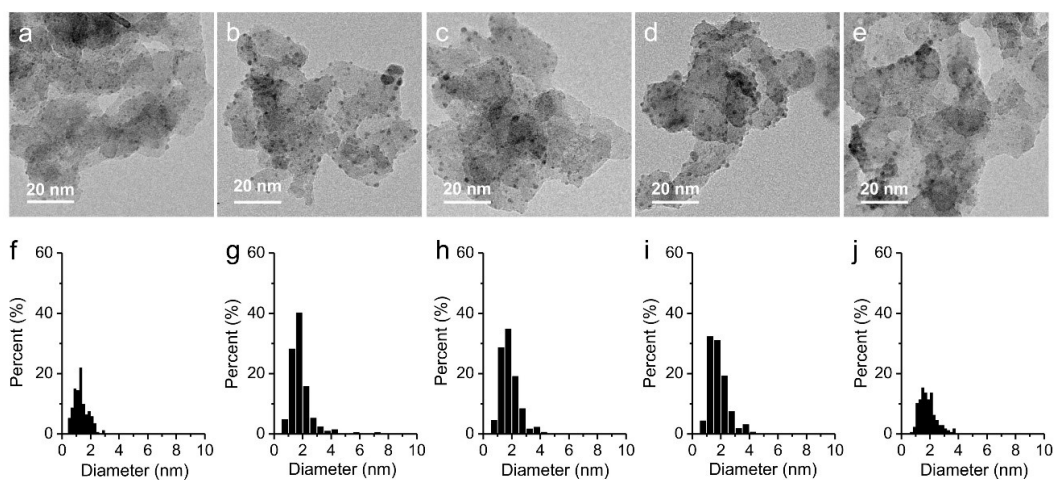

**Fig. S4** TEM images and Particle size distribution of Ru/Al<sub>2</sub>O<sub>3</sub> (a and f), Ce–Ru(0.125:1)/Al<sub>2</sub>O<sub>3</sub> (b and g), (c) Ce–Ru(0.25:1)/Al<sub>2</sub>O<sub>3</sub> (c and h), Ce–Ru(0.5:1)/Al<sub>2</sub>O<sub>3</sub> (d and i) and Ce–Ru(1:1)/Al<sub>2</sub>O<sub>3</sub> (e and j) samples.

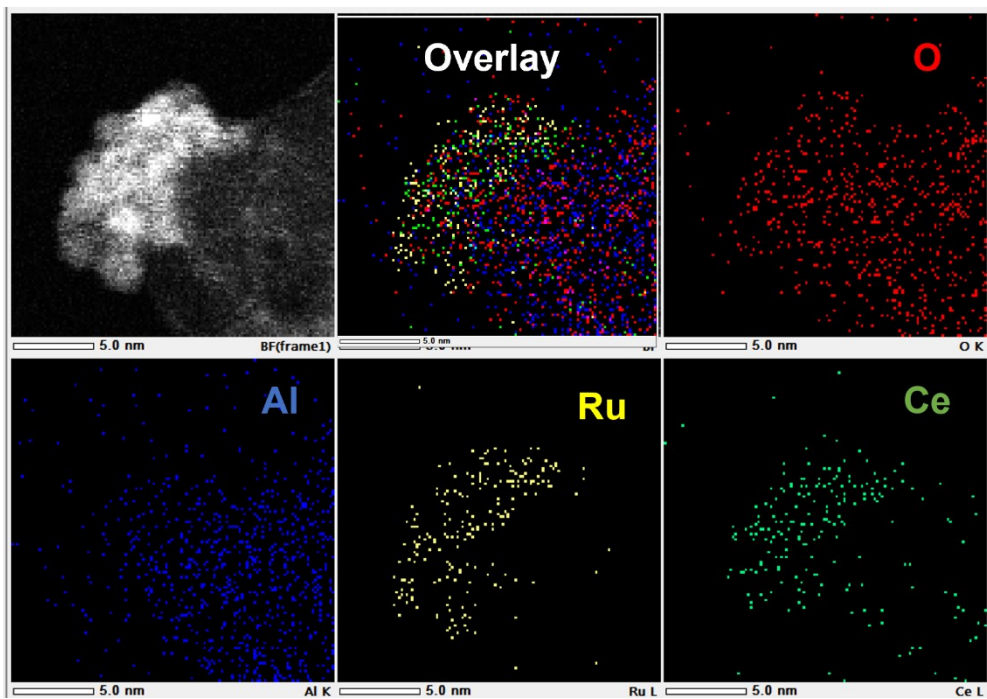

Fig. S5 STEM and EDX-Mapping of Ce-Ru(1:1)/Al<sub>2</sub>O<sub>3</sub> catalysts after stability test.

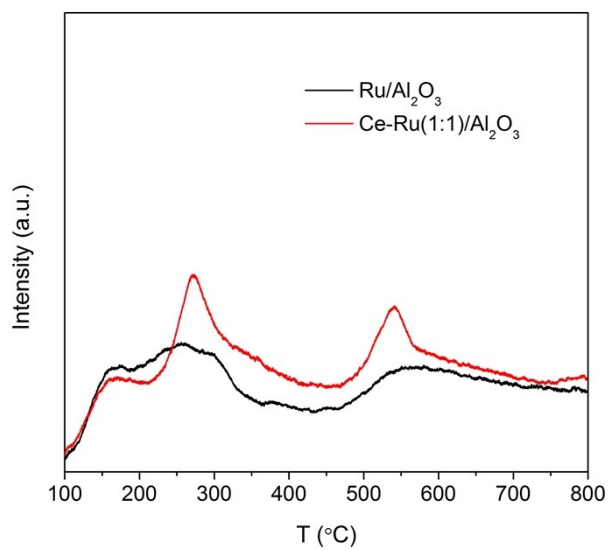

Fig. S6 NH<sub>3</sub>-TPD profiles of Ru/Al<sub>2</sub>O<sub>3</sub> and Ce-Ru(1:1)/Al<sub>2</sub>O<sub>3</sub> samples.

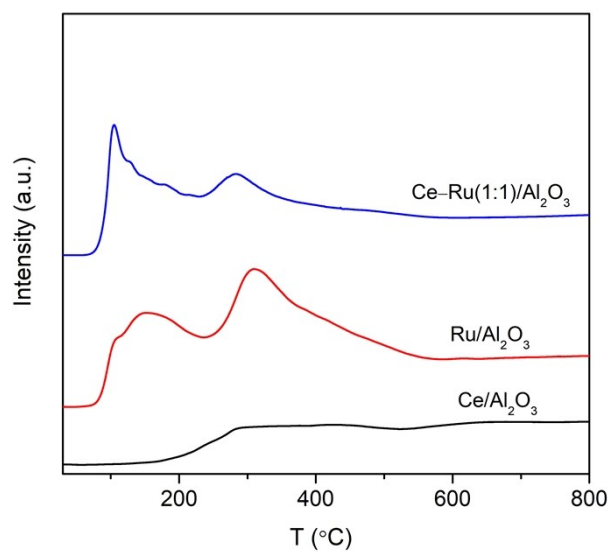

**Fig. S7** H<sub>2</sub>-TPR profiles of Ce/Al<sub>2</sub>O<sub>3</sub>, Ru/Al<sub>2</sub>O<sub>3</sub> and Ce-Ru(1:1)/Al<sub>2</sub>O<sub>3</sub> samples.

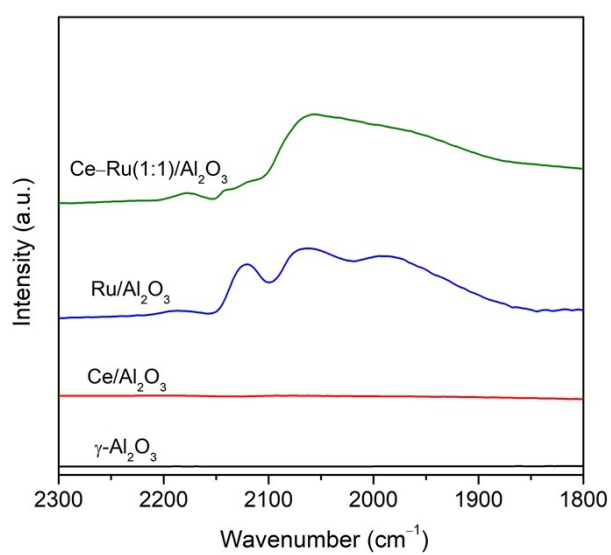

**Fig. S8** DRIFTS spectra of CO adsorption on Al<sub>2</sub>O<sub>3</sub>, Ce/Al<sub>2</sub>O<sub>3</sub>, Ru/Al<sub>2</sub>O<sub>3</sub> and Ce-Ru(1:1)/Al<sub>2</sub>O<sub>3</sub> catalysts.



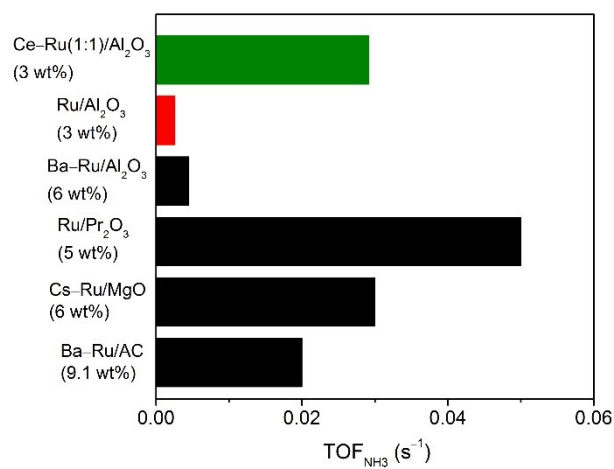

**Fig. S9** TOF<sub>NH<sub>3</sub></sub> values of Ru/Al<sub>2</sub>O<sub>3</sub>, Ce-Ru(1:1)/Al<sub>2</sub>O<sub>3</sub> and typical supported Ru catalysts for ammonia synthesis at 400 °C under 1.0 MPa.

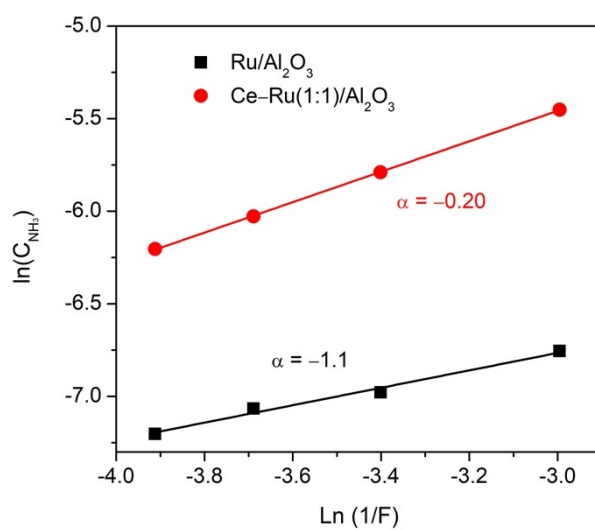

**Fig. S10** NH<sub>3</sub> reaction order of Ru/Al<sub>2</sub>O<sub>3</sub> and Ce-Ru(1:1)/Al<sub>2</sub>O<sub>3</sub> catalysts at 350 °C under 1.0 MPa.

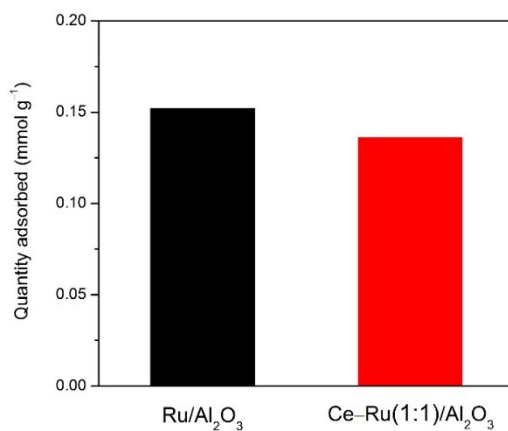

**Fig. S11** Chemisorption measurements of CO on the Ru in Ru/Al<sub>2</sub>O<sub>3</sub> and Ce-Ru(1:1)/Al<sub>2</sub>O<sub>3</sub> catalysts.

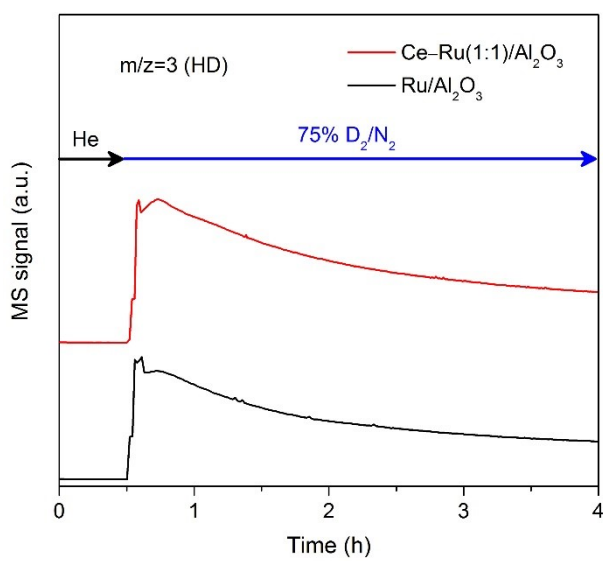

**Fig. S12** Formation of products over H<sub>2</sub> pretreated Ru/Al<sub>2</sub>O<sub>3</sub> and Ce-Ru(1:1)/Al<sub>2</sub>O<sub>3</sub> upon switching from He to 75% D<sub>2</sub>/N<sub>2</sub> at 450 °C under 1.0 MPa.

## 2. References

1. H. Abe, Y. Niwa, M. Kitano, Y. Inoue, M. Sasase, T. Nakao, T. Tada, T. Yokoyama, M. Hara and H. Hosono, *The Journal of Physical Chemistry C*, 2017, **121**, 20900-20904.
2. Y. Ogura, K. Sato, S. I. Miyahara, Y. Kawano, T. Toriyama, T. Yamamoto, S. Matsumura, S. Hosokawa and K. Nagaoka, *Chem Sci*, 2018, **9**, 2230-2237.
3. M. Kitano, Y. Inoue, H. Ishikawa, K. Yamagata, T. Nakao, T. Tada, S. Matsuishi, T. Yokoyama, M. Hara and H. Hosono, *Chem Sci*, 2016, **7**, 4036-4043.
4. Y. Wu, C. Li, B. Fang, X. Wang, J. Ni, B. Lin, J. Lin and L. Jiang, *Chem Commun (Camb)*, 2020, **56**, 1141-1144.
5. W. Li, S. Wang and J. Li, *Chem Asian J*, 2019, **14**, 2815-2821.
6. M. Hara, M. Kitano and H. Hosono, *ACS Catalysis*, 2017, **7**, 2313-2324.
7. B. Lin, K. Wei, J. Lin and J. Ni, *Catalysis Communications*, 2013, **39**, 14-19.
8. Y. Kadowaki and K. Aika, *Journal of Catalysis*, 1996, **161**, 178-185.
9. A. Miyazaki, I. Balint, K.-i. Aika and Y. Nakano, *Journal of Catalysis*, 2001, **204**, 364-371.
10. G. A. a. G. P. b. G. S. Pietro Moggi a, *Applied Catalysis A: General* 1995, **123**, 15.
11. F. Rosowski, A. Hornung, O. Hinrichsen, D. Herein, M. Muhler and G. Ertl, *Appl. Catal., A*, 1997, **151**, 443-460.
12. H. Bielawa, O. Hinrichsen, A. Birkner and M. Muhler, *Angew. Chem. Int. Ed.*, 2001, **40**, 1061-1063.
13. S. Siporin, *J. Catal.*, 2004, **225**, 359-368.
14. S. Dahl, J. Sehested, C. Jacobsen, E. Tornqvist and I. Chorkendorff, *J. Catal.*, 2000, **192**, 391-399.
15. M. Kitano, Y. Inoue, Y. Yamazaki, F. Hayashi, S. Kanbara, S. Matsuishi, T. Yokoyama, S. W. Kim, M. Hara and H. Hosono, *Nat. Chem.*, 2012, **4**, 934-940.
16. K. Aika, M. Kumasaka, T. Oma, O. Kato, H. Matsuda, N. Watanabe, K. Yamazaki, A. Ozaki and T. Onishi, *Applied catalysis*, 1986, **28**, 57-68.
17. Y. Tang, Y. Kobayashi, N. Masuda, Y. Uchida, H. Okamoto, T. Kageyama, S. Hosokawa, F. Loyer, K. Mitsuhara, K. Yamanaka, Y. Tamenori, C. Tassel, T. Yamamoto, T. Tanaka and H. Kageyama, *Advanced Energy Materials*, 2018, **8**.
